# Supplementary material
Source: publisher figshare collection journal article supplement (https://gsajournals.figshare.com/articles/dataset/_/12580454)

# Burkholderiaceae

# Enterobacteriaceae

# Moraxellaceae

# Pseudomonadaceae

# Rhizobiaceae

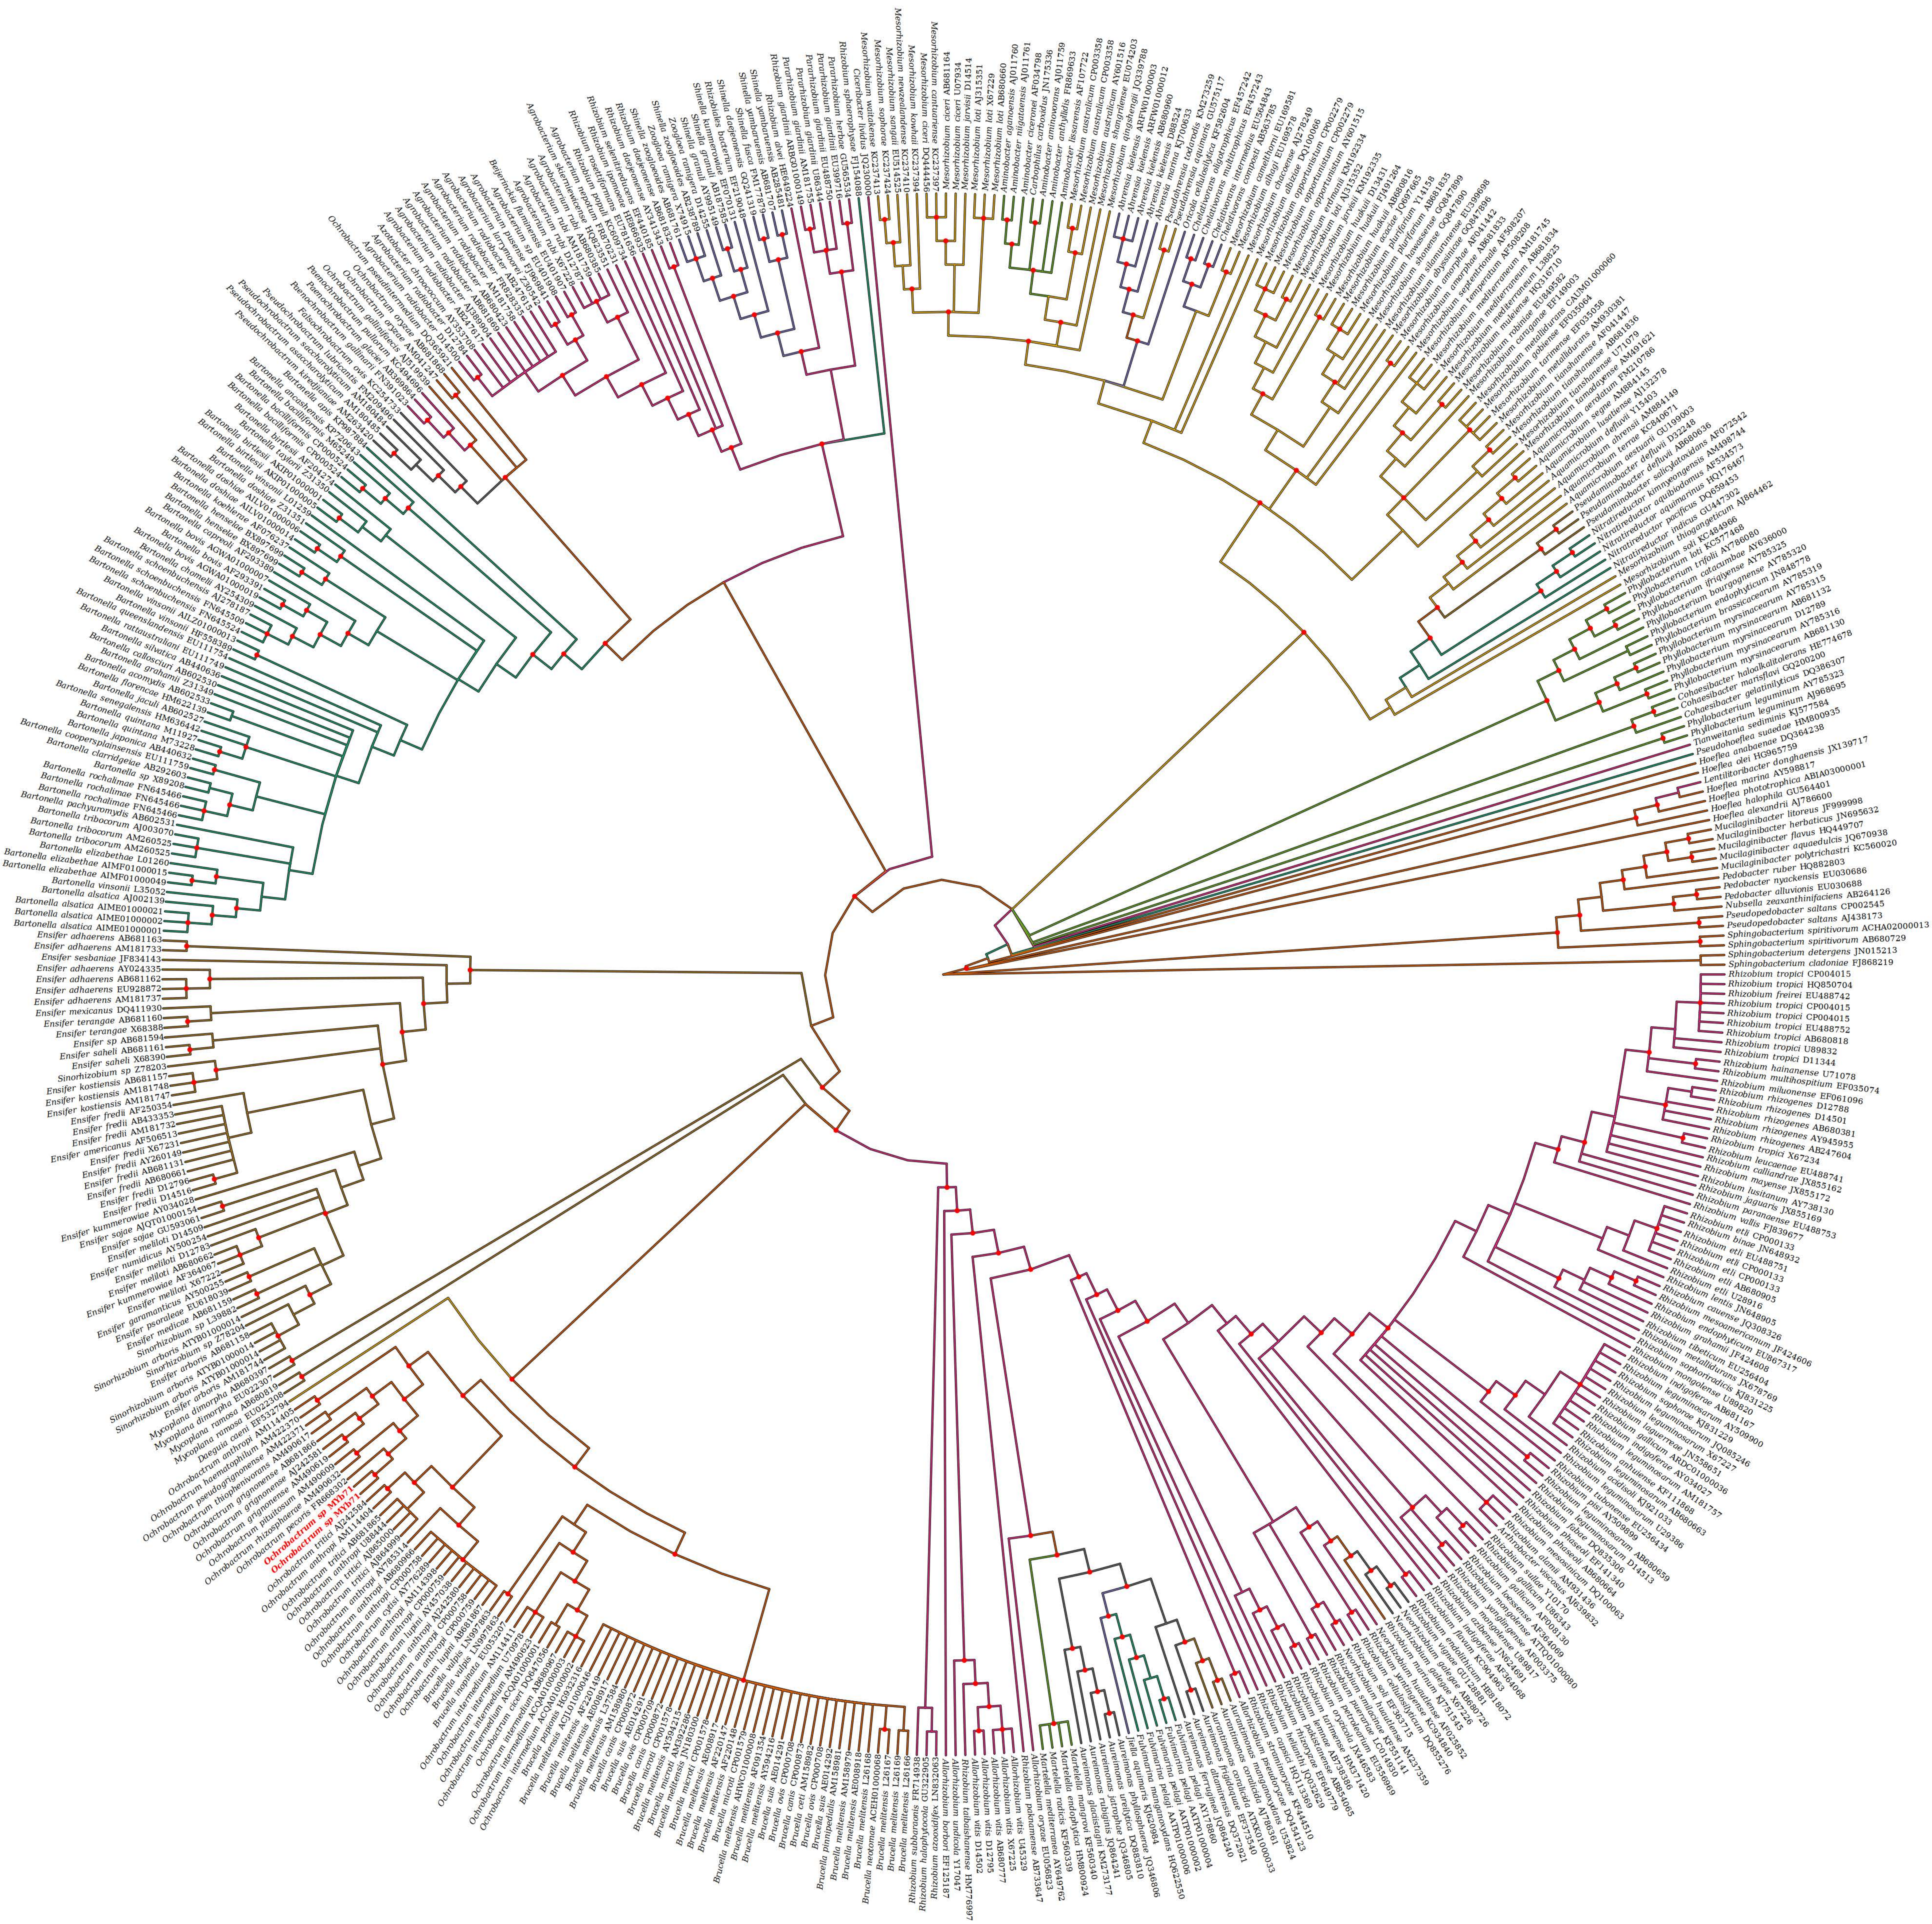

# Sphingobacteriaceae

# Sphingomonadaceae

# Weeksellaceae

# Xanthomonadaceae

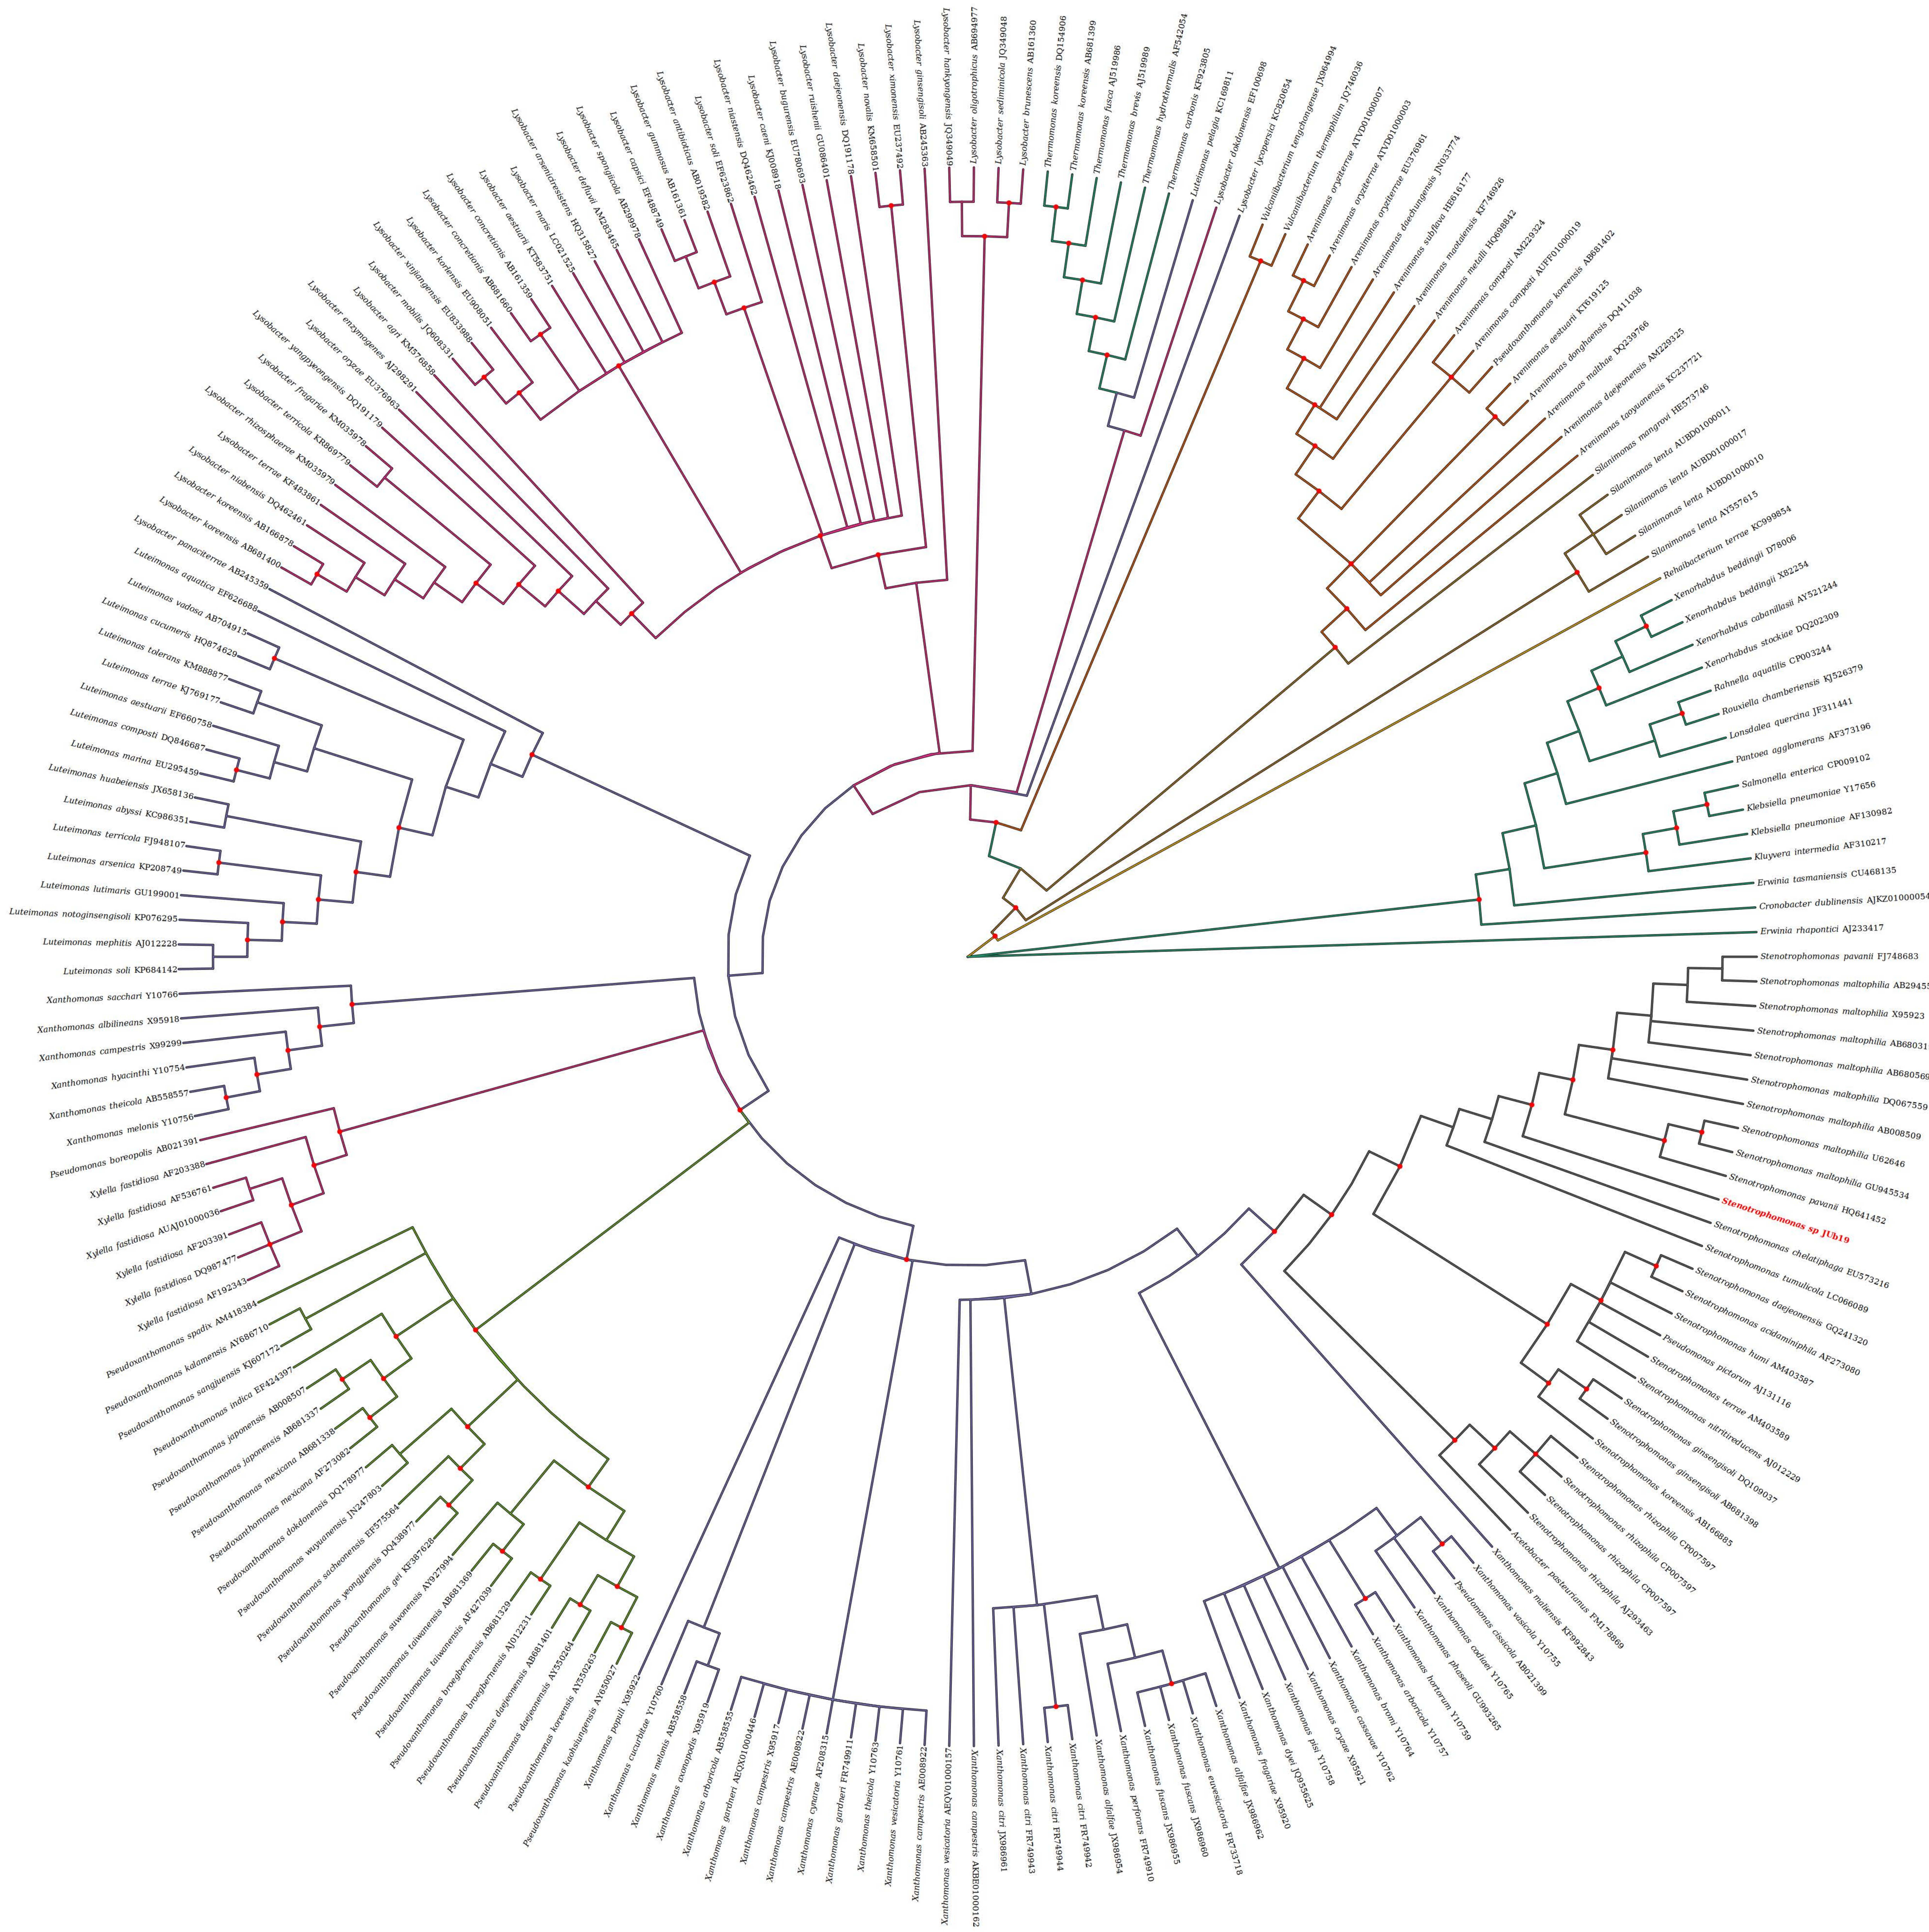

Supplement: Supplementary file 8 [file 1]
