# Supplementary material
Source: publisher figshare collection journal article supplement (https://gsajournals.figshare.com/articles/dataset/_/12580454)

**File S4 - Figure 10:** Partial approximately-maximum-likelihood phylogenetic trees from concatenated alignments of nucleotide of representative marker genes, using FastTree 2. Value on branches represent “Local support values” to estimate the reliability of each split in the tree (0 to 1, 1 being a high reliability).

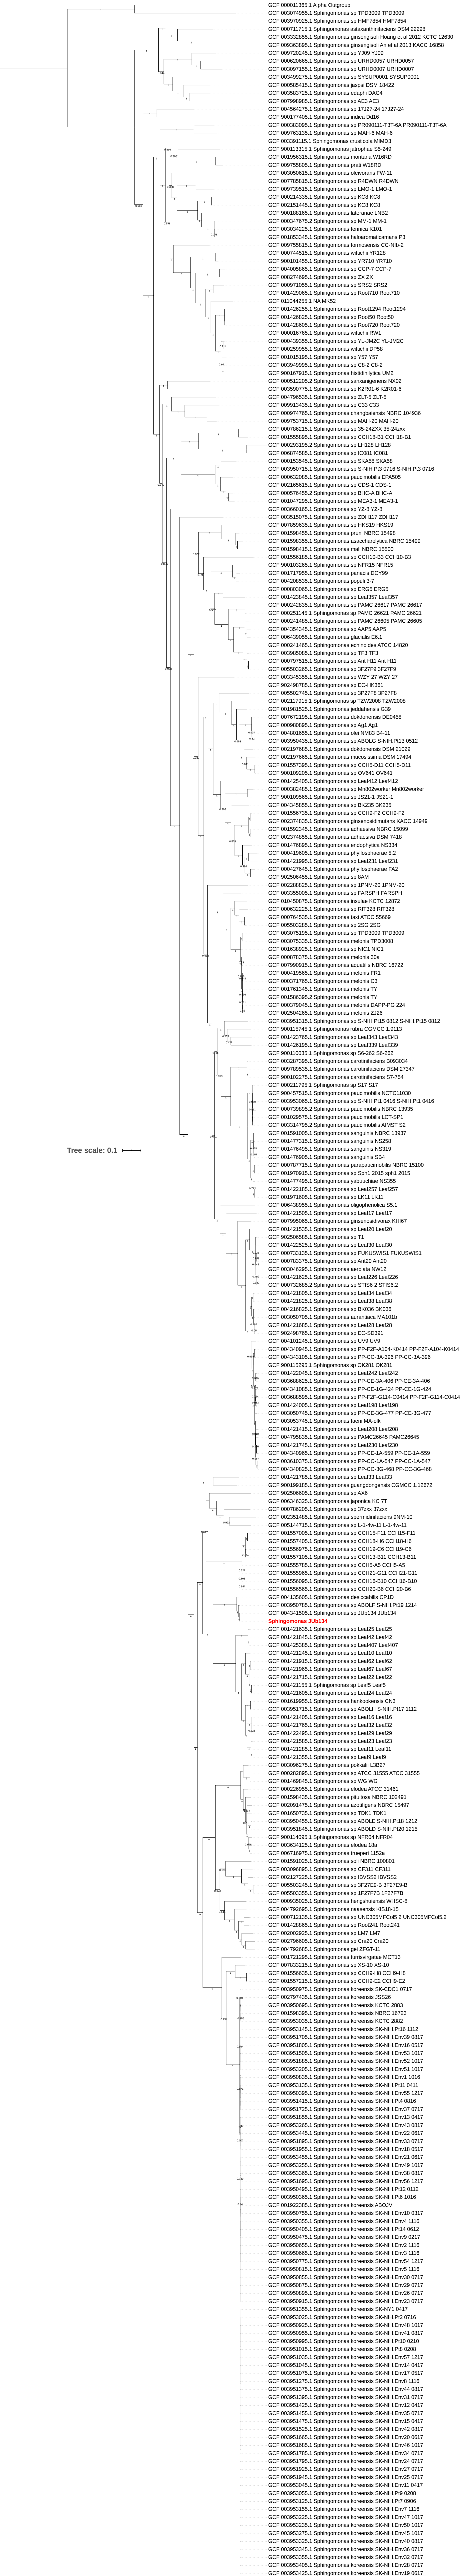

Supplement: Supplementary file 9 [file 1]
